# Supplementary material for: HPLC, NMR Based Characterization, Antioxidant and Anticancer Activities of Chemical Constituents from Therapeutically Active Fungal Endophytes
Source: PubMed Central journal article supplement (PMC11294646; doi:10.4014/jmb.2403.03036), 2024-05-06
Supplement: jmb-34-7-1452-supple.pdf [file jmb-34-7-1452-supple.pdf]

## Supplementary Figures

### **HPLC, NMR based characterization, antioxidant and anticancer activities of chemical constituents from therapeutically active fungal endophytes**

Waqas Hussain Shah<sup>1,4</sup>, Wajiha Khan<sup>1\*</sup>, Sobia Nisa<sup>2\*</sup>, Michael H.J. Barfuss<sup>3</sup>, Johann Schinnerl<sup>3</sup>, Markus Bacher<sup>4</sup>, Karin Vetschera<sup>3</sup>, Ashraf Ali<sup>5,6</sup>, Hiba-Allah Nafidi<sup>7</sup>, Yousef A. Bin Jardan<sup>8</sup>, John P. Giesy<sup>9,10,11,12,13</sup>

<sup>1</sup>Department of Biotechnology, COMSATS University Islamabad, Abbottabad Campus

<sup>2</sup>Department of Microbiology, The University of Haripur, Haripur 22620, Pakistan

<sup>3</sup>Department of Botany and Biodiversity Research, University of Vienna, Rennweg 14, 1030 Vienna, Austria <sup>4</sup>Department of Chemistry, Institute of Chemistry of Renewable Resources, University of Natural Resources and Life Sciences (BOKU), Tulln 3430, Austria

<sup>5</sup>Department of Chemistry, Faculty of Physical and Applied Sciences, The University of Haripur, Haripur 22620, Pakistan <sup>6</sup>School of Chemistry and Chemical Engineering, Henan University of Technology, Zhengzhou 450001, P.R. China <sup>7</sup>Department of Food Science, Faculty of Agricultural and Food Sciences, Laval University, 2325 Quebec City, QC G1V 0A6, Canada

<sup>8</sup>Department of Pharmaceutics, College of Pharmacy, King Saud University, P.O. Box 11451, Riyadh, Saudi Arabia <sup>9</sup>Toxicology Centre, University of Saskatchewan, Saskatoon, SK S7N 5B3 <sup>10</sup>Department of Veterinary Biomedical Sciences, University of Saskatchewan, Saskatoon, SK S7N 5B4, Canada <sup>11</sup>Department of Integrative Biology, Michigan State University, East Lansing, MI 48824, USA

<sup>12</sup>Department of Environmental Sciences, Baylor University, Waco, TX 76706, USA

<sup>13</sup>Department of Clinical Laboratory Sciences, College of Applied Medical Sciences, King Saud University, P.O. Box 10219, Riyadh, 11433, Saudi Arabia

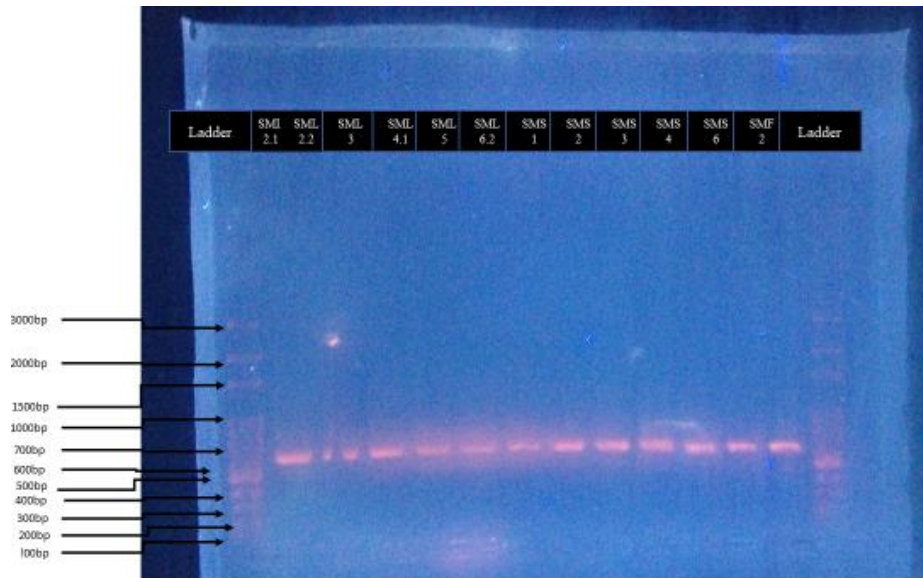

**Supplementary Fig S1. Polymerase chain reaction of endophytic fungi. Both corners contain a ladder of (100-3000 bps).**

The product size of the primer was 618 bps.

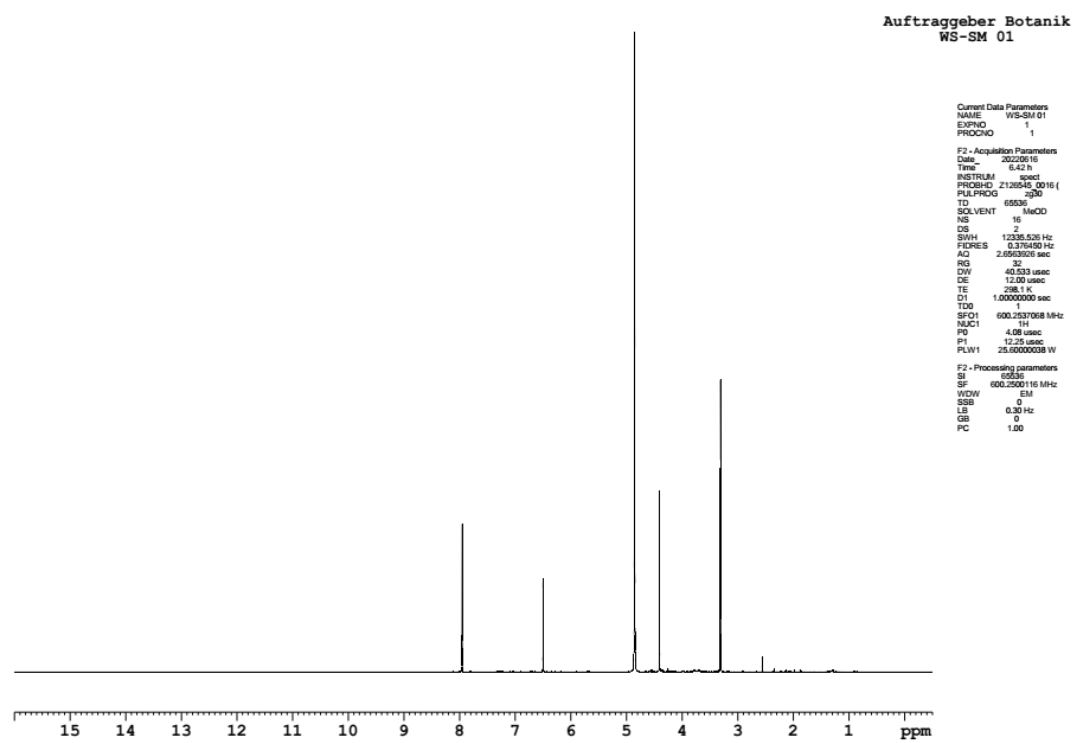

**Supplementary Fig. S2. <sup>1</sup>H Spectrum of kojic acid.**



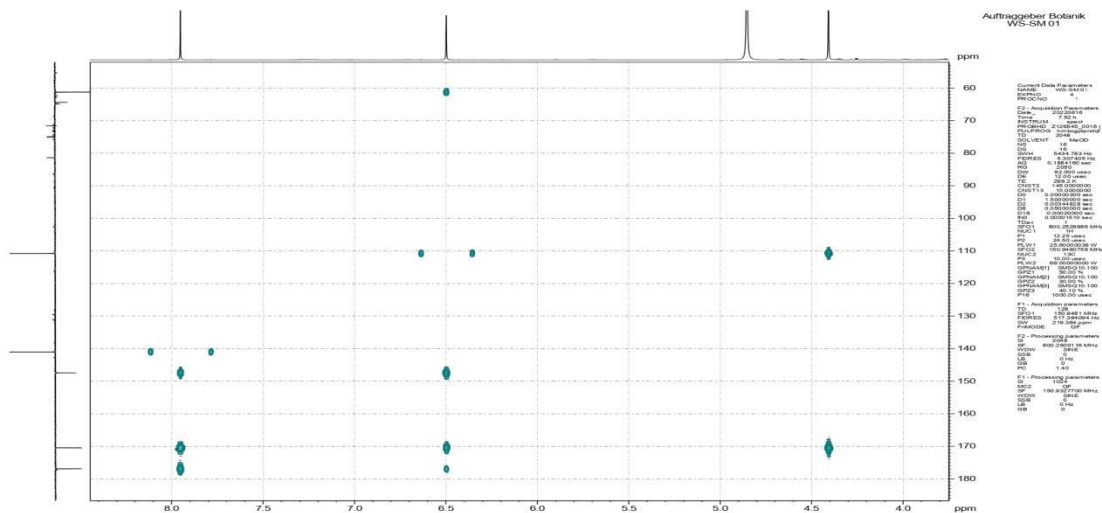

**Supplementary Fig. S5. HMBC (Heteronuclear Multiple Bond Correlation) spectrum of kojic acid.**

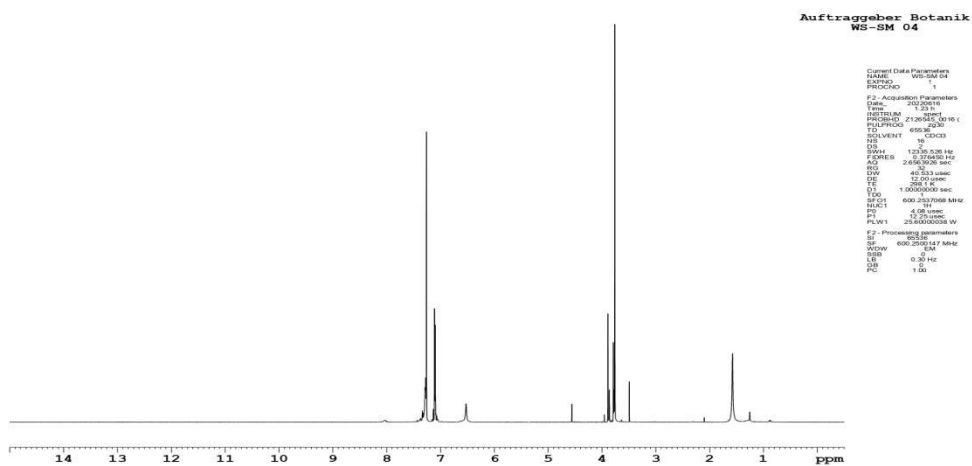

**Supplementary Fig. S6: <sup>1</sup>H Spectrum of compound 2 carbamic acid (methylene-4, 1-phenylene) bis-dimethyl ester.**

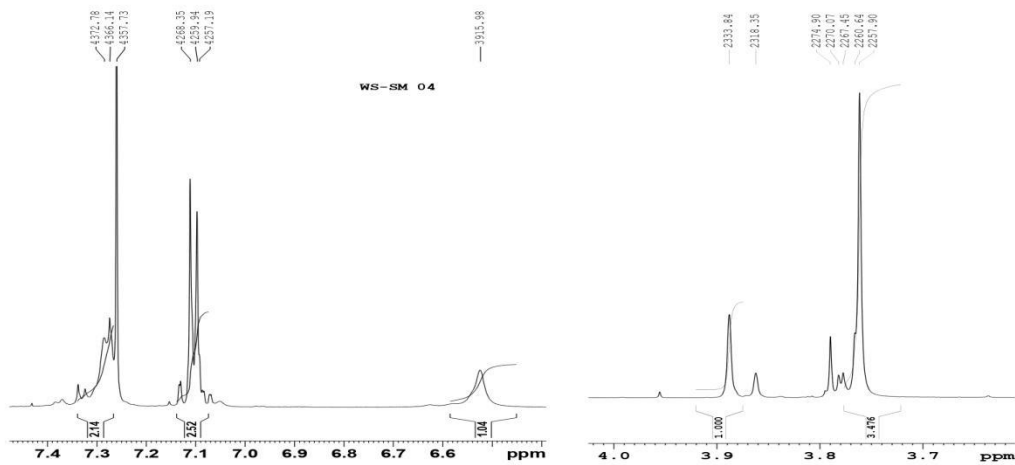

Supplementary Fig. S7:  $^1\text{H}$  Spectrum of compound 2 carbamic acid (methylene-4, 1-phenylene) bis-dimethyl ester, expanded regions.

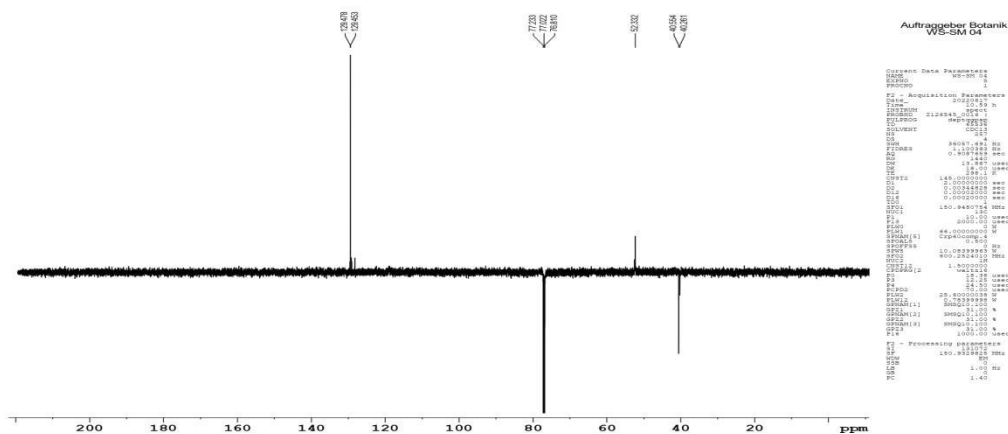

Supplementary Fig S8.  $^{13}\text{C}$  jmod spectrum of carbamic acid.

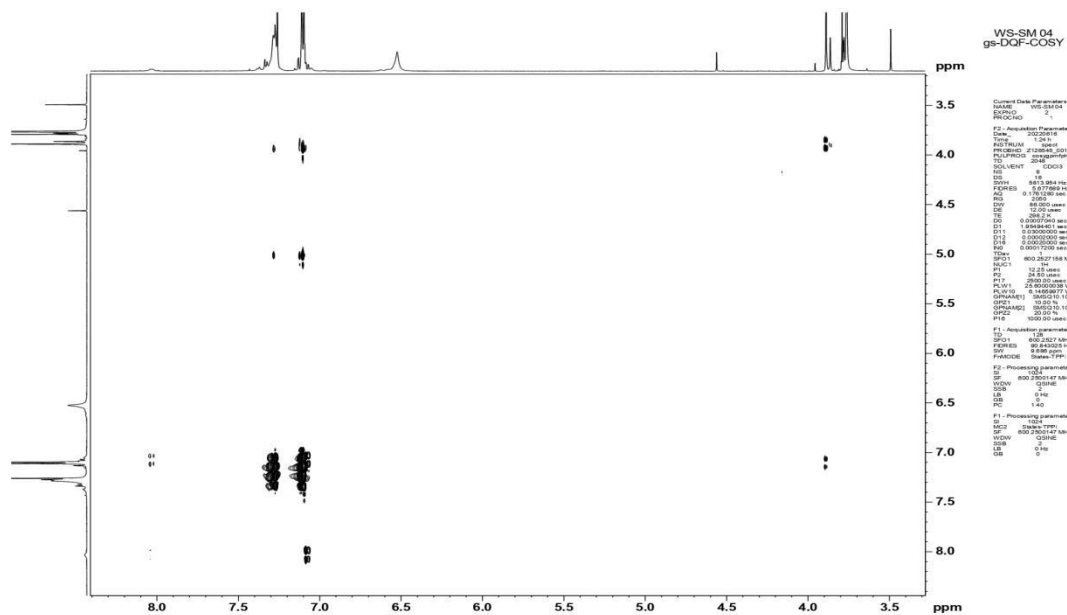

Supplementary Fig. S9. COSY spectrum of carbamic acid (methylene-4, 1-phenylene) bis-dimethyl ester.

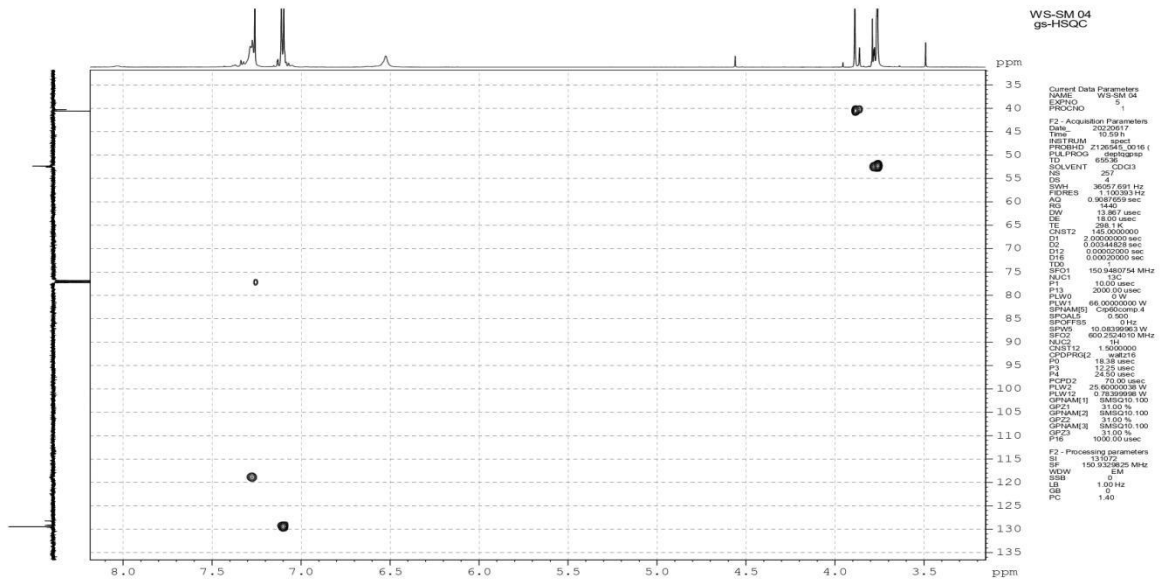

**Supplementary Fig. S10. HSQC spectrum of carbamic acid (methylene-4, 1-phenylene) bis-dimethyl ester.**

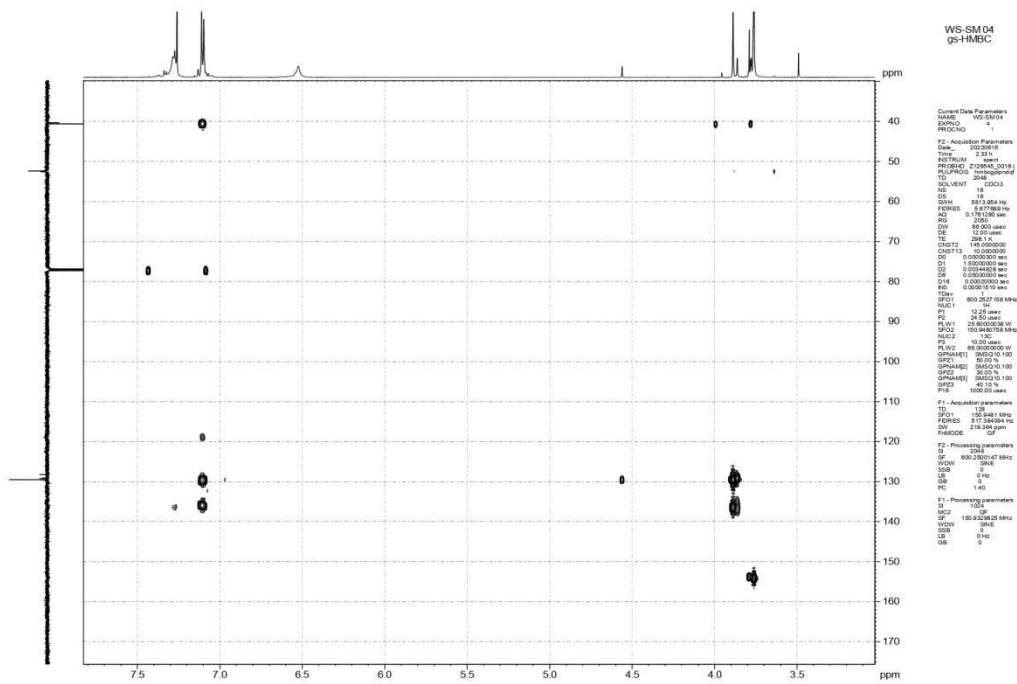

**Supplementary Fig. S11. HMBC (Heteronuclear Multiple Bond Correlation) spectrum of carbamic acid (methylene-4, 1-phenylene) bis-dimethyl ester.**

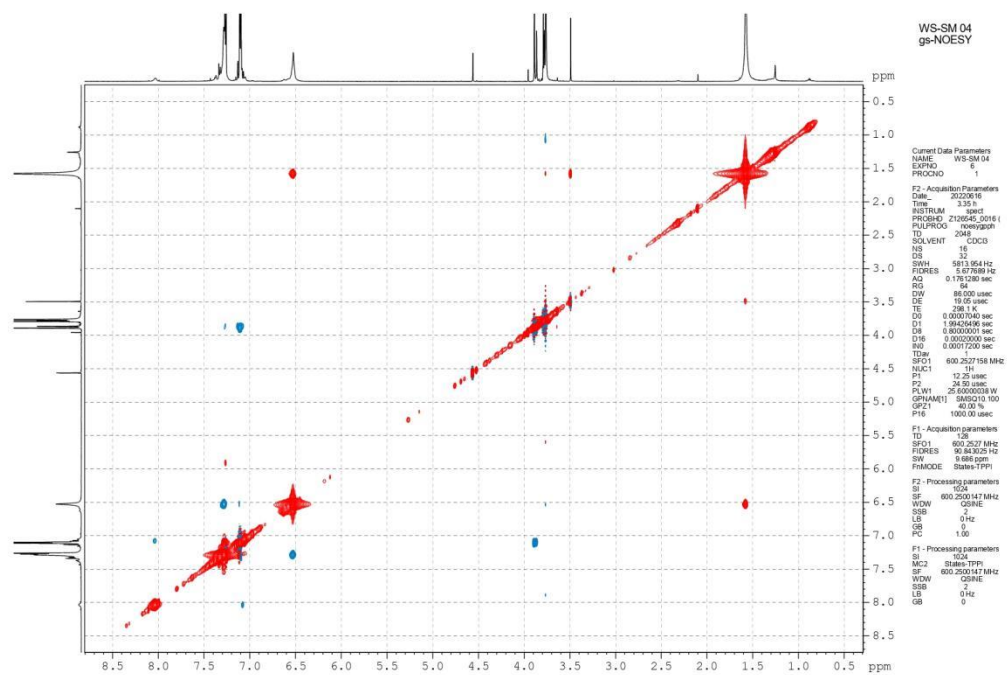

**Supplementary Fig. S12. NOESY(Nuclear Overhauser Effect Spectroscopy ) spectrum of carbamic acid (methylene-4, 1-phenylene) bis-dimethyl ester**

Print of all graphic windows

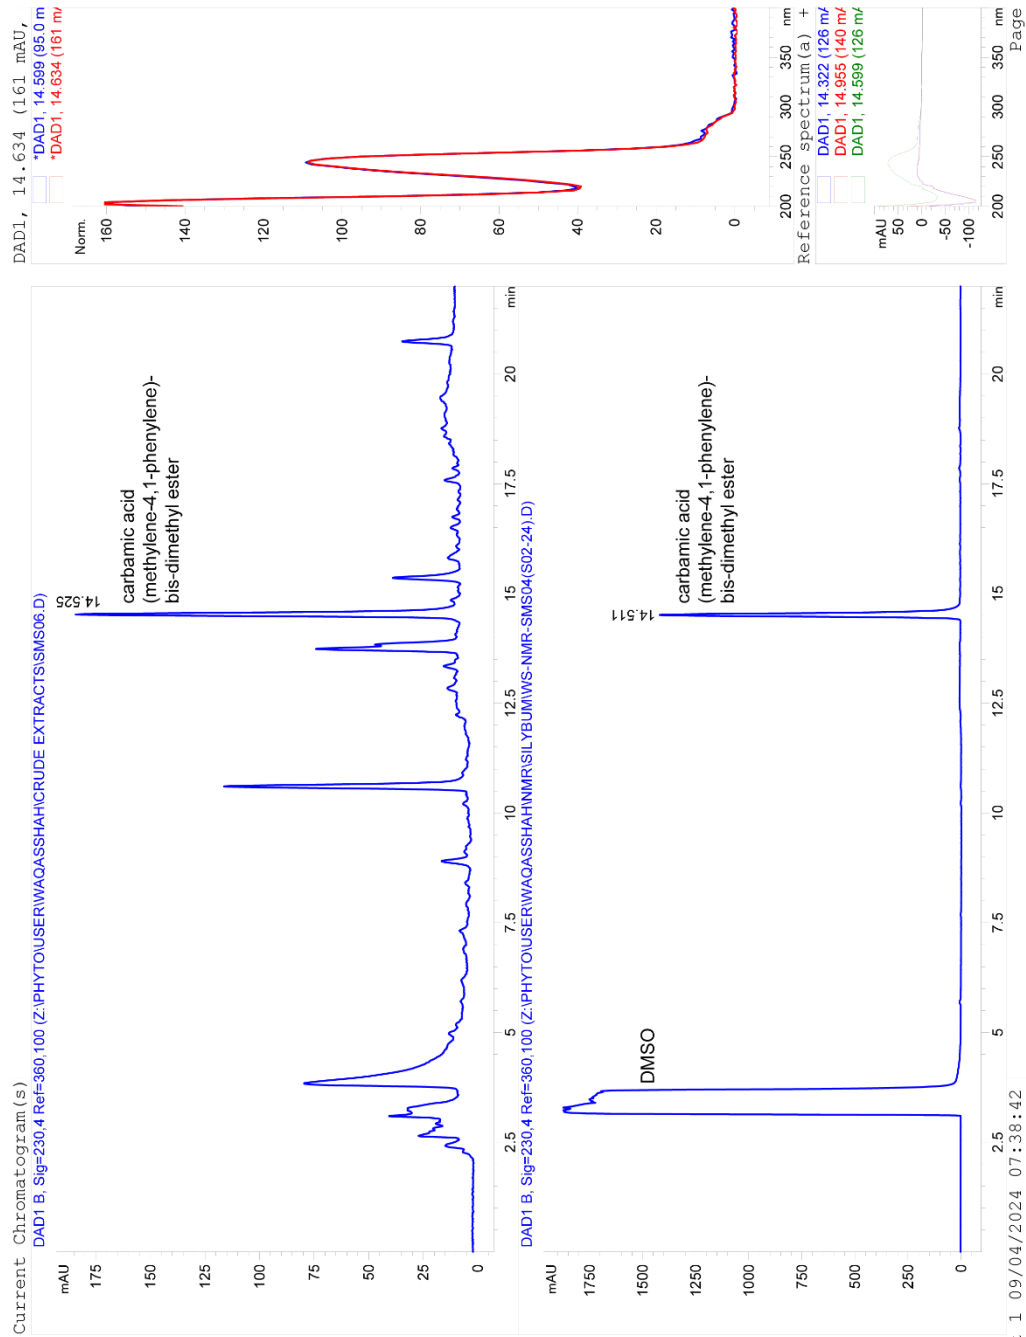

**Supplementary Fig. S13. HPLC-UV-DAD chromatogram of the crude extract and the purified carbamic acid (methylene-4, 1-phenylene) bis-dimethyl ester.**
